1           **Space-time dynamics in monitoring neotropical fish communities using eDNA**  
2                                           **metabarcoding**

3       Naiara Guimarães Sales<sup>1,2</sup>, Owen Simon Wangensteen<sup>3</sup>, Daniel Cardoso Carvalho<sup>4</sup>, Kristy  
4       Deiners<sup>5</sup>, Kim Præbel<sup>3</sup>, Ilaria Coscia<sup>1</sup>, Allan D. McDevitt<sup>1</sup>, Stefano Mariani<sup>1,6</sup>

5  
6       <sup>1</sup> Ecosystems and Environment Research Centre, School of Science, Engineering and  
7       Environment, University of Salford, UK.

8       <sup>2</sup> CESAM – Centre for Environmental and Marine Studies, Departamento de Biologia Animal,  
9       Faculdade de Ciências da Universidade de Lisboa, Lisbon, Portugal

10      <sup>3</sup> Norwegian College of Fishery Science, UiT - The Arctic University of Norway, Tromsø,  
11      Norway.

12      <sup>4</sup> Programa de Pós-graduação em Biologia de Vertebrados, Pontifícia Universidade Católica  
13      de Minas Gerais, Belo Horizonte, Brasil.

14      <sup>5</sup> Life Sciences, Natural History Museum, London, UK

15      <sup>6</sup> School of Natural Sciences and Psychology, Liverpool John Moores University, Liverpool,  
16      UK

17       **Corresponding author:**

18      Naiara Guimarães Sales, [naiarasl@gmail.com](mailto:naiarasl@gmail.com)

19      CESAM – Centre for Environmental and Marine Studies, Departamento de Biologia Animal,  
20      Faculdade de Ciências da Universidade de Lisboa, 1749-016 Lisbon, Portugal

21      Running title: eDNA for fish biodiversity monitoring in Brazil

22

23 **ABSTRACT**

24 The biodiverse Neotropical ecoregion remains insufficiently assessed, poorly managed, and  
25 threatened by unregulated human activities. Novel, rapid and cost-effective DNA-based  
26 approaches are valuable to improve understanding of the biological communities and for  
27 biomonitoring in remote areas. Here, we evaluate the potential of environmental DNA (eDNA)  
28 metabarcoding for assessing the structure and distribution of fish communities by analysing  
29 sediments and water from 11 locations along the Jequitinhonha River catchment (Brazil). Each  
30 site was sampled twice, before and after a major rain event in a five-week period and fish  
31 diversity was estimated using high-through-put sequencing of 12S rRNA amplicons. In total,  
32 252 Molecular Operational Taxonomic Units (MOTUs) and 34 fish species were recovered,  
33 including endemic, introduced, and previously unrecorded species for this basin. Spatio-  
34 temporal variation of fish assemblages was detected, richness during the first campaign was  
35 nearly twice as high as in the second sampling round; though peaks of diversity were primarily  
36 associated with only four locations. No correlation between  $\beta$ -diversity and longitudinal  
37 distance or presence of dams was detected, but low species richness observed at sites located  
38 near dams indicates that these anthropogenic barriers might have an impact on local fish  
39 diversity. Unexpectedly high  $\alpha$ -diversity levels recorded at the river mouth suggest that these  
40 sections should be further evaluated as putative “eDNA reservoirs” for rapid monitoring. By  
41 uncovering spatio-temporal changes, unrecorded biodiversity components, and putative  
42 anthropogenic impacts on fish assemblages, we further strengthen the potential of eDNA  
43 metabarcoding as a biomonitoring tool, especially in regions often neglected or difficult to  
44 access.

45 **Keywords:** eDNA, biodiversity assessment, fish, freshwater, Brazil, river

## 46 **1 INTRODUCTION**

47           Despite covering less than 1% of the Earth's surface, freshwater habitats harbour over  
48 40% of global fish diversity (Nelson, 2006; Dudgeon et al., 2006). Fish from rivers, lakes, and  
49 wetlands provide essential protein subsistence for a large proportion of human populations  
50 worldwide (FAO, 2012; McIntyre et., 2016), and are increasingly affected by anthropogenic  
51 impacts (e.g. habitat modification, fragmentation, climate change; Vörösmarty et al., 2010;  
52 Grill et al., 2019). Because of the global impact to freshwater ecosystems, their associated  
53 vertebrate populations are declining at alarming rates (83% decline since 1970; WWF, 2018),  
54 and their conservation and management are a priority for global biodiversity (IPBES, 2019).  
55 Nevertheless, despite broad agreement on the requirements to understand and monitor  
56 biodiversity and ecological networks in freshwater habitats (Socolar et al., 2015), our  
57 comprehension of biodiversity conservation in this realm lags behind terrestrial and marine  
58 environments (Jucker et al., 2018).

59           The Neotropical region harbours one of the greatest freshwater fish diversities in the  
60 world (approximately 30% of all described freshwater fish species), and is currently facing  
61 unprecedented levels of anthropogenic pressure. In this region, conservation and management  
62 actions in freshwater habitats are challenging due to a lack of infrastructure leading to sampling  
63 constraints, as well as a shortage of taxonomic expertise to fully characterise this megadiverse  
64 ichthyofauna (Reis et al., 2016). In Neotropical countries, such as Brazil, fish biodiversity  
65 assessment relies on sampling using traditional survey methods (e.g. gill nets and traps)  
66 followed by morphological identification, which might be selective, harmful, and have low  
67 detection rates for rare and elusive species) and small life-stages (Becker et al., 2015; Sales et  
68 al., 2018).

69           Use of specific fishing practices coupled with the remoteness and large geographic  
70 extension of most catchments, has meant that Neotropical rivers have not been sufficiently

71 surveyed for baseline estimates of fish diversity. Underestimation of fish diversity resulting  
72 from low sampling efficiency may provide biased metrics and hamper management and  
73 conservation plans (Trimble & van Aarde, 2012), ), including recovery plans for damaged  
74 ecosystems (Sales et al., 2018). In addition, with a significantly reduced investment in scientific  
75 research and conservation (Thomé and Haddad, 2019), there is an urge to move towards more  
76 cost-effective methods to estimate biodiversity at a broad scale (i.e. detecting and monitoring  
77 multiple species simultaneously in vast areas).

78         Molecular approaches offer a universal key to identify, assess and quantify biodiversity,  
79 especially in biodiversity-rich and understudied ecosystems and regions (Schwartz et al.,  
80 2006). One of the most effective approaches to circumvent the limitations of traditional surveys  
81 in mega-diverse systems is the use of DNA barcoding and metabarcoding (Gomes et al., 2015;  
82 Cilleros et al., 2019). Sequencing trace DNA present in the water (environmental DNA or  
83 eDNA) can now be reliably used to detect species presence (Deiner et al., 2017) and, to some  
84 extent, abundance (Doi et al. 2017; Ushio et al. 2018; Shelton et al., 2019). Recently, Cilleros  
85 et al. (2019) demonstrated the efficiency of eDNA metabarcoding in providing spatially  
86 extensive data on freshwater fish biodiversity in French Guyana, and a better discrimination of  
87 assemblage compositions when compared to traditional sampling. We recently showed the  
88 influence of sampling medium, as well as sampling preservation and time, on the  
89 reconstruction of ichthyofaunal assemblages in a Brazilian catchment, inferred through eDNA  
90 (Sales et al., 2019). Nevertheless, the vast majority of eDNA metabarcoding biomonitoring  
91 studies remain concentrated in temperate regions, in established and fairly well-accessible  
92 environments (Handley et al., 2019; McDevitt et al., 2019).

93         In this study, we use eDNA metabarcoding to unravel patterns of fish diversity in a  
94 poorly studied Brazilian catchment, the Jequitinhonha River Basin (JRB). This catchment  
95 belongs to the east Atlantic basin complex, characterised by a high number of species

96   endemism (Reis et al., 2016). Until 2010, the known ichthyofauna of this catchment included  
97   63 described fish species (including 10 introduced species and a substantial number of  
98   endangered species, Rosa & Lima 2008; Andrade-Neto, 2010), making this river a relatively  
99   low biodiversity ecosystem when compared to its neighbouring basins. This reduced species  
100   richness had been linked to historical geological and geographical features (Andrade-Neto,  
101   2010). However, the geological history of the Jequitinhonha is very similar to that of adjacent  
102   basins (e.g. Doce and Mucuri river), which led to the consideration that more contemporary  
103   factors may explain the low biodiversity in the catchment, including the lack of adequate  
104   surveys and impact from anthropogenic activities. The Jequitinhonha is known to be affected  
105   by severe droughts, the impact of dams in the main river course and tributaries, and the  
106   occurrence of introduced species (Sales et al., 2018; ). Thus, an inadequate baseline survey of  
107   the basin might still account for a great number of native and cryptic species yet to be described  
108   for this catchment (Jerep et al., 2016; Dutra et al., 2016; Nielsen, Pessali & Dutra, 2017).

109         Furthermore, as other semi-arid and arid regions, the Jequitinhonha faces great  
110   variation in water availability (i.e. long dry periods and sudden heavy rain periods; Leite et al.,  
111   2010). However, the influence of precipitation in fish assemblages dynamics have not been  
112   evaluated in this context. Here we assessed fish diversity, spatially (along the river stem and in  
113   two tributaries) and temporally, (before and after heavy precipitation) using eDNA  
114   metabarcoding to test whether this DNA-based method can estimate community structure  
115   along the course of this anthropogenically-impacted river and thus, be used for biomonitoring  
116   purposes.

## 117 **2 MATERIALS AND METHODS**

118

### 119 ***2.1 Study Area***

120         The Jequitinhonha River basin (Figure 1), Southeast Brazil (17° S, 43° W), flows  
121 between two biodiversity hotspots ('Cerrado' and the Atlantic Forest) and is characterised by  
122 a tropical climate and environmental heterogeneity. The main river flows over 1,082 km, from  
123 its source in Serro, at an elevation of 1200 m, to its outlet in the Atlantic Ocean at the locality  
124 of Belmonte. The main river stem is interrupted by two large dams built for hydroelectric power  
125 generation: the Irapé, the tallest dam in Brazil, built in 2006, and the Itapebi, established in  
126 2002.

127

### 128 ***2.2 Historical data and local reference database construction***

129         A compiled species list was built by retrieving all papers available using a Google  
130 Scholar search with the terms "fish" and "Jequitinhonha", combined with a search in  
131 Portuguese language journals (applying the terms "peixe", "Jequitinhonha", "ictiofauna"), we  
132 included data from research papers as well as compiling information on species occurrence  
133 from unpublished environmental reports (Table S1, Supplemental information).

134         To enhance the available reference sequence database in order to obtain a better  
135 taxonomic assignment, we retrieved all 12S rRNA mitochondrial gene fish sequences available  
136 from GenBank and sequenced 55 additional missing species (Table S2). Information regarding  
137 sample preparation and sequencing is provided in the Supplemental information.

138

### 139 ***2.3 eDNA sampling and processing***

140 Two sampling campaigns were conducted at 11 sites during a five-week interval (first  
141 sampling period: 22/01 to 01/02/2017; second sampling: 19/02 to 01/03/2017). In between the  
142 two sampling campaigns a major precipitation event (from 2.1-50mm in the first sampling  
143 event to 100-250 mm in the second sampling event - CPTEC/INPE, 2018) occurred. Sites  
144 included locations on the main river (nine) and one on each of two of the major tributaries (the  
145 Itacambiruçu river and the Araçuaí river; Fig. 1). At each site, six water samples of one liter  
146 each and two sediment samples (~25 mL) each were collected. Sediments samples were  
147 preserved in ethanol and kept cold during the sampling At the time of sampling proper storage  
148 conditions of samples in tropical field conditions had been untested, therefore, we split half of  
149 the water samples (N=3) and stored them on ice in a cooling box while for the other samples  
150 (N=3) the cationic surfactant benzalkonium chloride (BAC) was added at a final concentration  
151 of 0.01% as a preservation buffer to suppress the degradation of DNA by microorganisms  
152 (Yamanaka et al. 2017). The effect of storage treatment (ice vs BAC) on MOTU diversity  
153 recovery was significant only for samples obtained during the first campaign. Still, despite  
154 significant ( $p = 0.016$ ) only 2% of the variance was explained, whereas no significant  
155 difference was recovered for samples obtained during the second campaign (Sales et al. 2019),  
156 all replicates were used for downstream analyses in this study. In total, 132 water samples and  
157 44 sediment samples were analysed.

158 Environmental DNA sample filtration, DNA extraction from filtered water and  
159 sediment samples, amplification of the 12S rRNA fragment using the MiFish primer set (Miya  
160 et al., 2015), multiplexed library preparation, and sequencing of two separate libraries (Library  
161 1/LIB1 – first sampling event; Library 2/LIB2 – second sampling event) in one Illumina MiSeq  
162 platform run were conducted as described in Sales et al. (2019), and detailed in the Appendix  
163 included in the Supplemental information. Detailed procedures to control for contamination  
164 are also described in Supplemental information.

165

#### 166 ***2.4 Bioinformatic analyses and taxonomic assignment***

167         The metabarcoding bioinformatics pipeline used for data analysis was based on the  
168         OBITools software suite (Boyer et al., 2016), following the protocol described in Sales et al.  
169         (2019). Clustering was conducted using a step-by-step aggregation method (SWARM, Mahé  
170         et al., 2014) applying a clustering value of  $d=1$  (detailed information on evaluation of different  
171         clustering values can be found on Supplemental information). Molecular operational  
172         taxonomic units (MOTUs) and the inferred species (based on at least 97% of similarity with  
173         reference sequences; Sales et al., 2020) richness were compared among the three obtained  
174         datasets.

175         For the diversity analyses (species richness and  $\beta$ -diversity), we applied a conservative  
176         approach and treated our results as presence/absence-based as suggested by Li et al (2018).  
177         Often MOTUs are used as a proxy for species, however, the correlation between these two  
178         classifications of diversity are not straightforward. Richness in MOTUs is highly influenced  
179         by the occurrence of cryptic species and by the thresholds applied during the bioinformatic  
180         analyses (Pawlowski et al., 2018), which may cause an overestimation of true richness (e.g.  
181         inflation of different MOTUs belonging to the same species due to natural intraspecific  
182         variability, PCR amplification and/or sequencing errors). On the other hand, richness based on  
183         MOTUs being assigned to a species may be an underestimate due to the lack of a complete  
184         reference database or due to a low taxonomic resolution of the target gene fragment analysed.

185         To verify whether the inferred community diversity patterns significantly varied  
186         because of the species assignment process, two datasets were used for estimating community  
187         metrics of alpha and beta. Specifically, the filtered dataset included only MOTUs that could be  
188         identified to the rank of species, whereas the non-filtered dataset included all MOTUs retrieved



189 after quality filtering steps. The filtered dataset is a subset of the total MOTU diversity  
190 recovered, and thus it provides a more conservative overview for known fish diversity (Li et  
191 al., 2018).

192 A species name assigned to each MOTU might not correspond exactly to the species  
193 occurring in the Jequitinhonha River Basin (based on the compiled species list; Table S1)  
194 because when the correct species is not present in the reference database, the taxonomic  
195 assignment is based on the closest congeneric species. In this case, species not previously  
196 reported for this basin are marked with an asterisk in order to highlight that the species herein  
197 included might be an indicative of occurrence of the genus and not the exact species present in  
198 this river basin.

199 Statistical analyses were performed in R v3.5.1 (R Core Team 2019). Replicates were  
200 pooled (water=6 samples per site, sediment=2 samples) before the following statistical  
201 analyses. Alpha-diversity (species richness) was estimated as the total number of MOTUs  
202 (unfiltered dataset), or number of MOTUs assigned to species level (filtered dataset), at each  
203 sample site.  $\beta$ -diversity was obtained by generating a distance matrix based on the Jaccard  
204 coefficient, using the *vegdist* function implemented in *vegan* 2.5-2 (Oksanen et al. 2013). The  
205 Jaccard distance is based on presence or absence of species (value of 0 means both samples  
206 share the same species whereas 1 means samples have no species in common). Principal  
207 Coordinates Analysis (PCoA) was used to determine the relationship between distance and  
208 sites in the  $\beta$ -diversity matrix (*cmdscale* function) and the correlation between  $\beta$ -diversity and  
209 longitudinal distance and the  $\beta$ -diversity and presence of physical barriers (dams) was tested  
210 using a Mantel test (Li et al., 2018). The geographic distance matrix between sites was  
211 estimated using the road route because the road follows the river course and thus, this distance  
212 would provide a better estimate when compared to linear distance between two sample  
213 locations. The matrix used for testing the influence of physical barriers was constructed by

214 weighting distance values between sites according to the existence of barriers (e.g. 0 – no  
215 physical barrier between sites, 1- one barrier between sites and 2 – two barriers).

216 Even after our extensive effort to supplement the reference database for taxonomic  
217 assignment improvement, most of the MOTUs recovered were not identified to species level  
218 (see above) and, thus, a great portion of biodiversity information that could be used for diversity  
219 assessments is not included in the reduced filtered dataset. To verify the total diversity  
220 recovered and to visualize the community data, we used a hierarchical structure of taxonomic  
221 classifications, in the R package Metacoder (Foster et al., 2017). This package, designed for  
222 metabarcoding data, provides “heat tree” plots using statistics associated with taxa (e.g. read  
223 abundances) and allows for a visual comparison between samples that takes into account their  
224 taxonomic/phylogenetic diversity. Venn diagrams were obtained by comparing the orders and  
225 families included in the compiled species list, and orders and families detected in each of the  
226 eDNA datasets (filtered and non-filtered) using BioVenn (Hulsen, Vlieg, & Alkema, 2008).

227

## 228           **3 RESULTS**

229           Our extensive review of both published and non-published literature sources resulted  
230 in 111 species records for the Jequitinhonha River Basin (Table S1).

231           We obtained 16.1 million raw reads (LIB1 - 6,399,823; LIB2 - 9,704,699) in one  
232 Illumina MiSeq run (See Supplemental information for details). After quality control,  
233 clustering and all initial filtering steps, 2056 (LIB1) and 967 (LIB2) MOTUs were kept, with  
234 154 and 59 MOTUs being assigned to species with >0.97 -min-identity, respectively. The  
235 number of retained MOTUs varied considerably between filtered and unfiltered datasets and  
236 for several species, more than one MOTU was also recovered (Figure 2, Table S3 and Table  
237 S4).

238

### 239   **3.1 Taxonomic assignment**

240           Based on the combined data (including all filtered datasets - species >0.97 identity)  
241 detected fish diversity included six orders, 20 families, 28 genera and at least 34 fish species  
242 (Figure 2, Table S4). Characiformes (n=12) and Siluriformes (n=12) were the two orders  
243 represented by the largest number of species identified and all the remaining orders were  
244 comprised by less than five species.

245           A comparison between species identified by eDNA and closely related species reported  
246 for the JRB suggests that several congeneric species (e.g. *Leporinus*, *Prochilodus*,  
247 *Trichomycterus*) are not discernible using our generally applied bioinformatic threshold of  
248 3.0% due to a lack of taxonomically informative variation in the ~170 bp fragment of the 12  
249 rRNA gene, for these groups (Table S5).

250           Comparing the data obtained for both sampling times (Figure 3, Table S6), four species  
251 were detected only during the first sampling (*Australoheros facetus*, *Cyprinus carpio*\*,

252 *Hypostomus* sp., *Trichomycterus* sp.), whilst *Coptodon zilli*\* and *Hoplias intermedius* were  
253 detected only in the second sampling.

254 Sediment samples failed to detect five species (*Australoheros facetus*, *Cyprinus*  
255 *carpio*\*, *Hypostomus gymnorhyncus*\*, *Poecilia reticulata*, *Trichomycterus* sp.), whilst water  
256 samples detected all species present in the sediments. Analyses of water and sediment samples  
257 demonstrated the occurrence of both widely distributed as well as less abundant species.  
258 Several taxa (e.g. *Leporinus* sp., *Prochilodus* sp., *Rhamdia quelen*) were detected in both water  
259 and sediment samples in most of sampling sites, in at least one sampling campaign, and  
260 therefore seem to have a broad geographic distribution in the Jequitinhonha river basin.

261 A remarkable result obtained by eDNA included the detection in all analysed sites of  
262 species rarely reported in traditional sampling studies (e.g. *Crenicichla* sp., Figure 3). Also we  
263 may highlight, the occurrence of putative new records for this basin including invasive species  
264 such as the dourado - *Salminus brasiliensis*\* and pacamã - *Lophiosilurus alexandri*\*.  
265 Furthermore, some species, including native and non-indigenous species, were restricted to a  
266 few locations (e.g. native: roncador *Wertheimeria maculata* (sample sites 1, 3, 8 and 10); non-  
267 indigenous: oscar *Astronotus ocellatus* (sample site 7); chameleon cichlid *Australoheros*  
268 *facetus* (sample site 11); tilapias *Coptodon* sp.\* (sample sites 1 and 2); or were detected in only  
269 one campaign (e.g. *Australoheros facetus*, *Coptodon* sp.\*, carp *Cyprinus carpio*\*, wolf fish  
270 *Hoplias intermedius*, pleco *Hypostomus gymnorhyncus*\*, pencil catfish *Trichomycterus* sp.).

271 The filtered dataset provides a potentially more conservative estimate of fish diversity  
272 at the rank of species because many MOTUs could not be assigned a name using the 97%  
273 similarity threshold. Fish diversity depicted by the heat trees based on all detected MOTUs (i.e.  
274 the unfiltered dataset) shows that diversity remains especially high for the Order  
275 Characiformes, as many families appear to be comprised of several MOTUs (e.g. Anostomidae,

276 Prochilodontidae; Figure 4). Comparisons between the filtered and unfiltered datasets  
277 demonstrated that a conservative approach (i.e. using filtered data) might lead to a biodiversity  
278 information loss since it greatly reduces the diversity in MOTUs recovered and fails in  
279 detecting orders and families known to occur in this catchment but that were not identified up  
280 to the species level (Figure 5).

281

### 282 *3.2 Species richness and Beta diversity*

283 During the first campaign, highest MOTU richness was found in water samples from  
284 the most upstream (site 1) and downstream (site 11) sampling sites, followed by sampling sites  
285 4 and 8 (Figure 6A). The lowest number of MOTUs was recovered for sample site 7. Beta  
286 diversity patterns showed similarities between sample sites 4 and 11, and sample sites 1 and 8,  
287 whereas sample site 7 showed the most distinct fish assemblage when compared to all  
288 locations. Environmental DNA recovered from water samples collected three weeks later,  
289 demonstrated that species richness among sites fluctuate in time in this catchment (Figure 6B),  
290 with generally greater homogeneity in the species richness amongst all sample sites in the late  
291 sampling event. Still, the most upstream and downstream locations (1, 2, 10, 11), alongside  
292 sample site 8, still harboured the highest number of species.

293 Data recovered from sediment samples provided a different overview of species  
294 richness and beta diversity. Overall, the number of species recorded for sediment samples was  
295 lower compared to water samples in the first campaign (Figure 6C). Sample site 1 had a much  
296 lower species richness compared to water samples along with sampling sites 2, 4, 8, 9, 10. An  
297 increase in the species richness was detected for sampling sites 3, 5 and 7, while sample sites  
298 11 and 8 were confirmed as highly species-rich locations. In the second campaign (Figure 6D),

299 when compared to data recovered from water samples, six sample sites (1, 2, 6, 8, 9, 10) had a  
300 lower species richness, while higher values were obtained for sample sites 3, 4, 7.

301 Over time, the pattern of harbouring the highest species richness appeared relatively  
302 constant in sites 1 and 11 for both sampling media, except in the first campaign where fewer  
303 species were detected in location 1 for sediment. Yet, the most downstream location kept an  
304 almost stable species richness in both sampling media for both sampling campaigns.

305 Longitudinal distance had a negligible effect on beta diversity amongst sample sites ( $p$ -  
306 value  $> 0.05$ , Table 1) and the presence of physical barriers (e.g. dams) also did not show a  
307 significant influence on beta diversity of different sample types (water and sediment, Table 1).  
308 A positive significant correlation was found between filtered and unfiltered datasets, for both  
309 water and sediment (Table 1.)

310 For both sampling media, despite the variation in taxa richness showed by both datasets,  
311 the pattern of alpha diversity variation among sample sites obtained for filtered (species) and  
312 unfiltered (MOTUs) datasets were still quite congruent (Figure 7). However, for sediment  
313 samples collected in the first campaign, sites 3 and 11 had a greater MOTU diversity when  
314 compared to all nine remaining locations (Figure 7C). Despite also being the most species rich  
315 sites, the great amount of MOTUs obtained and not assigned indicates that a great diversity  
316 remains hidden in this sampling medium. Also, as demonstrated by the PCoA (Figure 7C), in  
317 the first campaign these sites had a more distinct fish assemblage when compared to the others.  
318 Furthermore, a higher resolution was obtained for the unfiltered dataset as a more segregated  
319 sample clustering is evident in the PCoA ordination. Sediment samples from the first campaign  
320 exhibited a peculiar clustering, with highly diverse samples in 3 and 11 strongly separated from  
321 all other sites.

## 322 **4 DISCUSSION**

323 The understanding of species distribution and the processes shaping spatial variation  
324 and community composition are crucial for applying sustainable management schemes and  
325 ensure timely conservation of biodiversity, especially for endemic and threatened species. Such  
326 actions also require methods that allow for rapid and robust detection of biodiversity at  
327 different spatial scales (Kelly et al., 2014). Here, we used eDNA metabarcoding of water and  
328 sediment samples to investigate fish community variation over time along the course of a  
329 Neotropical river.

330 We found that eDNA metabarcoding applied to understanding fish distributions in a  
331 neotropical setting greatly enhanced our ability to not only measure richness along the course  
332 of a large river, but also to reveal hidden diversity and putative unrecorded species invasions.  
333 The compiled list of species (N=111) reported for the Jequitinhonha river basin herein was  
334 higher than previously recorded (N=63) in 2010 (Andrade-Neto, 2010). Hence, our thorough  
335 evaluation of all possible taxonomic information available at the time of our study estimates  
336 the occurrence of more than 80 species in this catchment (Andrade-Neto, 2010; Godinho et al.,  
337 1999). Our molecular assessment based on eDNA metabarcoding demonstrates that, as of yet,  
338 there may be even more species yet to be recorded and putting the richness of this basin on par  
339 with other closely adjacent basins thought to harbour higher diversity. These results  
340 demonstrate our current lack of understanding of tropic diversity in many systems and  
341 corroborates that new DNA based methods are ideal in generating new baselines for  
342 biodiversity monitoring.

343

### 344 **4.1 Introduced and native species**

345 Environmental DNA metabarcoding allows the detection of multiple species  
346 simultaneously, including species not expected to occur in an area (Deiner et al., 2017), helping  
347 to track biological invasions and providing an early warning of species introduction. Here,  
348 almost 30% of the taxa detected by eDNA were non-indigenous species, including species not  
349 reported yet for this catchment. To our knowledge, previous records of *Salminus brasiliensis*  
350 and *Lophiosilurus alexandri* occurrence in the JRB are absent from the literature. These are  
351 commercially important species, already introduced for fishery purposes in several Brazilian  
352 basins (Vitule et al., 2014). Hence, their occurrence in the Jequitinhonha is not necessarily a  
353 surprise. However, it raises concerns about the ecological consequences of such unmanaged  
354 introductions. Biodiversity loss is not only restricted by species disappearance, but also by a  
355 reduction in ecosystem services due to an increase of biological similarity between areas (i.e.  
356 species loss or increase through biological introductions leading to biotic homogenization;  
357 Rahel, 2000).

358 It has been widely documented that analysis of eDNA surpasses traditional methods for  
359 assessment of biodiversity and detection of invasive species (Schmelzle & Kinziger, 2016;  
360 McDevitt et al., 2019). The only cyprinid previously documented in this basin was  
361 *Hypophthalmichthys molitrix*. Herein, we registered the presence of *Cyprinus carpio*, another  
362 species that has been widely introduced to Brazilian waters (Alves et al., 2007). Environmental  
363 DNA metabarcoding also detected various species of tilapia (*Oreochromis* sp. and *Coptodon*  
364 *zilli*). The impacts of tilapia invasion are well known worldwide, and all species show high  
365 invasive potential, including in Neotropical countries (Casseiro et al., 2017).

366 Our study also detected remarkable cases, such as the native species *Crenicichla* sp.  
367 The genus *Crenicichla* is one of the most species rich among the South American Cichlids,  
368 where it is known to widely occur. However, the genus is still lacking an improved taxonomic  
369 resolution and conservation status evaluation (Kullander & de Lucena, 2006). In 2006, an



370 expedition applied extensive sampling efforts to collect *Crenicichla* sp. in the Jequitinhonha,  
371 without any success, and this species was only documented in 2009 by an environmental report  
372 based on traditional sampling and morphological identification (Kullander & Lucena, 2006;  
373 Intertechne, 2009). An issue reported worldwide, is that even when monitoring programmes  
374 are conducted, most of the data obtained are often not published or made available and thus  
375 remain inaccessible to further scientific studies (Lindenmayer & Likens, 2009; Revenga et al.,  
376 2005). Here, eDNA metabarcoding data revealed that this species might be present at several  
377 locations in the Jequitinhonha, indicating a possible large geographical distribution.

378 Taxonomic issues are often present in monitoring programs and the risk of  
379 misidentification exists, regardless of the method applied (i.e. traditional sampling,  
380 morphological identification, eDNA; Radinger et al., 2018; Jerde, 2019). Erroneous  
381 identifications might also be present in the reference databases, especially in highly biodiverse  
382 regions such as the Neotropics, where the amount of unknown and undescribed taxa and the  
383 occurrence of cryptic species represent substantial issues. As demonstrated in previous studies,  
384 identification of some species might be problematic when using eDNA metabarcoding based  
385 on the 12S fragment employed here, due to its lack of taxonomic resolution and the  
386 incompleteness of the reference databases (Yu et al., 2012; Eiler et al., 2013). Because a gene  
387 tree is not necessarily related to a species tree, the phylogenetic resolution it provides can be  
388 obscured for groups of taxa. The imperfect taxonomic resolution might allow the multiple  
389 assignment of congeneric species (i.e. one species being concomitantly assigned to its multiple  
390 congeners) when several reference sequences are available (please see example of *Prochilodus*  
391 sp. below). In contrast, when the reference database is not complete for all species occurring  
392 in the area, several MOTUs belonging to distinct species might be assigned to and erroneously  
393 identified as the single closely related species available in the database (Sales et al., 2020) For  
394 instance, most MOTUs belonging to *Prochilodus* sp. could not be assigned to species level due

395 to a high similarity among orthologous sequences from congeneric species. This poses a  
396 conservation issue, since *Prochilodus argenteus* is an invasive species in the Jequitinhonha,  
397 and is believed to have recently diverged from the endemic species *P. hartii* (Melo et al., 2018).  
398 Henceforth, due to the conservative criteria applied to analyse the data, the number of species  
399 detected is surely underestimated.

400 Six anostomids are described for the Jequitinhonha, and here we identified one of these  
401 species (*Megaleporinus garmanii*), but also identified two species not previously reported  
402 (*Leporinus copelandii* and *Hypomasticus mormyrops*). The only previous record of *Leporinus*  
403 *copelandii* was deemed as an historical error (Andrade-Neto, 2010). Cilleros et al. (2019),  
404 despite using a different 12S fragment, also reported the limitations in the taxonomic  
405 assignment of species belonging to the genus *Leporinus*, therefore our data set is unable to  
406 clarify the nuances within this group.

407

## 408 **4.2 Anthropogenic impacts and species richness**

409 Ecological communities vary in time and space, and the monitoring of these dynamics  
410 is essential for conservation purposes (Bálint et al., 2018). In the Jequitinhonha River basin,  
411 significant spatial and temporal fluctuations in fish assemblages inferred from eDNA were  
412 detected. The longitudinal distance and presence of barriers did not explain community  
413 variation ( $p > 0.05$ ); however, anthropogenic impacts might still have an influence on fish  
414 diversity distribution in this river basin. Regarding data recovered from water samples, low  
415 species richness were recovered from the reservoirs (3 – José Gonçalves, 9 – Salto da Divisa)  
416 and the first sites located downstream the dams (5 – Coronel Murta and 10 – Itapebi). The  
417 presence of dams is a well known fish diversity reduction factor since these barriers greatly  
418 impact the environment (i.e. modification of physical and ecological characteristics of the

419 habitats, such as modifications in water flow, nutrient dynamics, water quality and temperature;  
420 Pelicice & Agostinho, 2007; Pompeu et al., 2012). However, changes in fish distribution and  
421 communities composition may also arise from plenty of distinct alterations and complex  
422 interactions in the impounded environment (Agostinho, Pelicice & Gomes, 2008). Therefore,  
423 despite no significant correlation between dams and fish diversity was herein found, the use of  
424 eDNA metabarcoding offers a promising tool for evaluating the impoudment's impact on fish  
425 distribution and thus, should be further investigated.

426 The sites comprising the highest fish diversity in this basin were represented by  
427 locations characterized by different anthropogenic influences. The most upstream site  
428 (Mendanha) is located in a less populated and more pristine region (Table S7, Supplementary  
429 Material), near two areas of natural preservation (State Parks Biribiri and Rio Preto). The other  
430 two sampling sites (Almenara, 8, and Belmonte, 11) are located near more densely populated  
431 cities and impacted areas (i.e. due to the deforestation and mining activities, siltation increases  
432 towards the river mouth and represents one of the greatest impacts in the Jequitinhonha river -  
433 IBGE, 1997). Almenara, is a particularly impacted area, and during the sampling had a low  
434 water level and accumulation of sediments, which might have contributed to increase the eDNA  
435 concentration and accumulation, increasing the species diversity, despite the low  
436 environmental quality.

437 The putative effect of anthropogenic activities on fish eDNA recovery herein described  
438 corroborates the well-known impacts of human actions (e.g. construction of dams, species  
439 introduction, pollution) leading to biotic homogenization (Agostinho et al., 2008, Ribeiro et  
440 al., 2017).

441

### 442 **4.3 Seasonal changes in fish assemblages**

443 Seasonal changes driven by natural factors (e.g. water flow, rainfall) could also  
444 contribute to explain assemblage variation even over a short time frame (i.e. weeks) as mobile  
445 species, such as fish, can rapidly disperse and vary their distribution in response to changing  
446 abiotic conditions (Arrington & Winemiller, 2006; Fitzgerald et al., 2017).

447 Water availability shows a great temporal variability in semi-arid and arid regions, with  
448 short, but intense, rainfall episodes followed by long dry periods (Leite et al., 2010). The  
449 Jequitinhonha river basin is inserted in a semi-arid region and in the first sampling campaign  
450 it was facing a severe drought. Before the second sampling campaign, an increase in the  
451 average accumulated rainfall (from 2.1-50mm in the first sampling event to 100-250 mm in the  
452 second sampling event; CPTEC/INPE, 2018) might have contributed to a higher evenness in  
453 MOTU richness/fish diversity amongst sample sites (regarding the contemporary species  
454 richness inferred through water samples). The climatic and hydrological changes followed by  
455 the onset of the rainy season usually triggers the start of fish migration in the semi-arid regions  
456 (Chellappa et al., 2003; Chellappa et al., 2009). An increased water volume and subsequently  
457 higher connectivity of aquatic habitats might stimulate the dispersal and result in reduced  
458 densities of organisms (Fitzgerald et al., 2017). Therefore, the result here presented might  
459 suggest that freshwater fish assemblages in tropical habitats may vary significantly between  
460 dry and wet seasons. Besides the apparent homogenization found after the rainfall event, an  
461 important factor to take into consideration is the reduction of diversity recovered in the second  
462 campaign when compared to the first. The ecology of DNA might play an important role  
463 regarding this matter, as eDNA molecules could be more diluted in the water column  
464 decreasing the detectability of some species (e.g. rare or less abundant species).

465

#### 466 **4.4 eDNA transport and species richness**

467 Another factor we need to take into account is eDNA transport from locations upstream  
468 from our sample sites. This transport could lead to an overestimation of species richness  
469 recovered for each sample site, and, the species identification per site therefore does not mean  
470 that the species themselves are present there at the time of collection (Barnes & Turner, 2016;  
471 Deiner et al., 2014). Still, eDNA transport distances may vary between river systems due to  
472 abiotic and biotic factors (e.g. temperature, pH, bacterial load, or seasonal changes such as  
473 drought or intense rainfall periods; Deiner et al., 2016). Most of the studies evaluating the effect  
474 of eDNA upstream transportation reported travel distances of few kilometers, whereas, a travel  
475 distance higher than 100km was demonstrated by Pont et al. (2018) for a high discharge (m<sup>3</sup>/s)  
476 river system. Still, despite the eDNA downstream transportation, the latter study demonstrated  
477 the capability of eDNA in providing an accurate snapshot of fish assemblage composition in a  
478 large river and finally, suggested that a distance of around 70 km would be enough to limit the  
479 potential noise of eDNA transport. Therefore, despite having a high discharge rate (average of  
480 409 m<sup>3</sup>/s), the approximate distance between sites was 100 km and thus, the influence of eDNA  
481 transport on species detected at each site might not be considered as a great concern here.  
482 However, as no study has been conducted in Brazilian lotic environments focusing on  
483 understanding eDNA transport and diffusion, it is difficult to draw sound conclusions regarding  
484 this matter and so, additional studies focusing on the information recovered from eDNA in  
485 large neotropical rivers might contribute to expand the knowledge of its complex  
486 spatiotemporal dynamics.

487 The high alpha diversity values found for the site located at the river mouth (site 11,  
488 Belmonte) deserves some consideration since this region has marine influence (including the  
489 detection of one marine family, Engraulidae, by sediment samples in this sample site, Figure  
490 4) and its abiotic characteristics (e.g. increased salinity) would be expected to restrict the  
491 occurrence of some freshwater species. A hypothesis that could explain the detection of species

492 not expected to occur in this area includes eDNA transport and accumulation. Species shed  
493 DNA constantly, which can be available in the water column or bound to superficial sediment.  
494 A higher concentration and longer persistence of fish eDNA in the sediments might contribute  
495 to eDNA molecule resuspension which might affect inferences from aqueous DNA in both  
496 spatial and temporal scales (Turner et al., 2015; Graf & Rosenberg, 1997; Bloesch, 1995;).

497 Due to the fragmentation of the Jequitinhonha River, this site (site 11, Belmonte) is  
498 located in a region characterized by a high level of sediment trapping  
499 ([freeflowingriver.org/maptool/](http://freeflowingriver.org/maptool/)) and possibly, this segment can act as an “eDNA reservoir” due  
500 to the accumulation of molecules transported throughout the river. In addition to that, an  
501 increase in water flow and tidal movements can also cause eDNA particle resuspension  
502 (increasing the probability of retrieving old eDNA from the sediment beds – Jamieson et al.,  
503 2005), which, associated with the resistance applied by the incursion of the marine waters into  
504 the river, can contribute to retain and resuspend the eDNA accumulated in this area, making it  
505 available in the water column. Considering this, river mouths should then be further  
506 investigated as putative eDNA reservoirs since it could contribute in future sampling strategies  
507 focusing on obtaining a snapshot of the entire fish community at a large scale.

508 Bioinformatics and technical aspects also play an important role in diversity recovery  
509 from eDNA samples, and the existing trade-off between uncertainty and stringency may be  
510 carefully considered when interpreting eDNA results as it might lead to false negative or false  
511 positive detections (Evans et al., 2017; Grey et al., 2018). Regarding the analysed datasets, the  
512 filtered data is considered as a subset of the total diversity recovered and showed a lower  
513 diversity at the order and family levels. However, the significant positive correlation between  
514 datasets demonstrated that beta-diversity is not influenced by the filtering criteria applied as  
515 much as the effect of sampling medium or sampling time. As suggested by Li et al. (2018), the  
516 filtered dataset provided a more conservative overview of fish diversity, compared to the

517 unfiltered dataset and thus did not detect several families and orders known to be present in  
518 this catchment.

519 Fish diversity depicted by the heat trees based on the unfiltered data shows that a hidden  
520 diversity might be present, especially for the Order Characiformes, as many families appear to  
521 comprise several MOTUs (e.g. Anostomidae, Prochilodontidae). This likely reflects the  
522 presence of multiple genera/species such as in the Anostomidae, known to harbour at least  
523 seven species in this basin, which are absent from the reference sequence databases. Therefore,  
524 to avoid underestimating the biodiversity, and reduce ambiguity in eDNA-based species  
525 detection, we stress the importance of coordinating morphological surveys alongside DNA  
526 assessments. Most importantly, there is also a need of increasing efforts towards building more  
527 complete genetic reference databases, ideally composed of whole mitochondrial genomes, as  
528 the lack of reference sequences has been considered as a great hindrance to fulfill the potential  
529 of eDNA metabarcoding in assessing biodiversity rich ecosystems (Cilleros et al., 2019; Sales  
530 et al., 2020).

531 Given the unprecedented rates of population and species decline and the increasing  
532 anthropogenic impacts on freshwater communities, the importance of a rapid, robust and  
533 efficient monitoring program has never been more in need for this ecosystem. Here we  
534 illustrated eDNA ecology when analysing an entire river basin from the headwater to the river  
535 mouth, and highlighted some of the challenges of applying eDNA metabarcoding in spatio-  
536 temporal ecological studies, including recommendations for future work. Understanding eDNA  
537 metabarcoding dynamics is an important step to make it a complementary monitoring tool to  
538 traditional methods. This enhancement can improve the applicability of eDNA metabarcoding  
539 for biomonitoring purposes in Brazilian freshwaters and therefore, allow the detection of  
540 elusive, rare or patchily distributed species and provide data for neglected and difficult to  
541 access localities.

542

543 **ACKNOWLEDGEMENTS**

544 This work was supported by Conselho Nacional de Desenvolvimento Científico e Tecnológico  
545 (CNPq) and Science without Borders Program (Grant #204620/2014-7). NGS also thanks  
546 FCT/MCTES for the financial support to CESAM (UID/AMB/50017/2019), through national  
547 funds. DCC is grateful to CNPq for the productivity fellowship (CNPq 306155/2018-4). We  
548 are grateful to Leticia Sales for the invaluable fieldwork assistance and Gilberto Nepomuceno  
549 Salvador for assistance with the map.

550

551

552



## 553 REFERENCES

- 554 Agostinho, A. A., Pelicice, F. M., & Gomes, L. C. (2008). Dams and the fish fauna of the  
555 Neotropical region: impacts and management related to diversity and fisheries. *Brazilian*  
556 *Journal of Biology*, 68(4, Suppl. ), 1119-1132. doi: 10.1590/S1519-69842008000500019
- 557 Alves, C. B. M., Vieira, F., Magalhães, A. L. B. & Brito, M. F. G. 2007b. Impacts of non-native  
558 fish species in Minas Gerais, Brazil: Present situation and prospects. Pp. 291-314. In: Bert, T.  
559 M. (Ed). Ecological and genetic implications of aquaculture activities. Florida, Springer, 548p.
- 560 Andrade-Neto, F. R. (2010). Estado atual do conhecimento sobre a fauna de peixes da bacia do  
561 Jequitinhonha. *MG Biota*, 2, 23–35.
- 562 Arrington, D. A., and K. O. Winemiller. (2006). Habitat affinity, the seasonal flood pulse, and  
563 community assembly in the littoral zone of a Neotropical floodplain river. *Journal of the North*  
564 *American Benthological Society*, 25, 126–141.
- 565 Bálint, M., Pfenninger, M., Grossart, H. P., Taberlet, P., Vellend, M., Leibold, M. A., ... Jansen,  
566 M. (2018). Environmental DNA time series in ecology. *Trends in Ecology and Evolution*,  
567 33(12), 945–957. doi: 10.1016/j.tree.2018.09.003
- 568 Barnes, M. A., Turner, C. R., Jerde, C. L., Renshaw, M. A., Chadderton, W. L., & Lodge, D.  
569 M. (2014). Environmental conditions influence eDNA persistence in aquatic systems.  
570 *Environmental Science and Technology*, 48(3), 1819–1827. doi: 10.1021/es404734p
- 571 Becker, R. A., Sales, N. G., Santos, G. M., Santos, G. B., & Carvalho, D. C. (2015). DNA  
572 barcoding and morphological identification of neotropical ichthyoplankton from the Upper  
573 Paraná and São Francisco. *Journal of Fish Biology*, 87, 159–168. doi: 10.1111/jfb.12707
- 574 Bloesch, J. (1995). Mechanisms, measurement and importance of sediment resuspension in  
575 lakes. *Marine and Freshwater Research*, 46, 295–304.
- 576 Boyer, F., Mercier, C., Bonin, A., Le Bras, Y., Taberlet, P., & Coissac, E. (2016). obitools: A  
577 unix-inspired software package for DNA metabarcoding. *Molecular Ecology Resources*, 16(1),  
578 176–182. doi: 10.1111/1755-0998
- 579 Cassemiro, F. A. S., Bailly, D., da Graça, W. J., & Agostinho, A. A. (2018). The invasive  
580 potential of tilapias (Osteichthyes, Cichlidae) in the Americas. *Hydrobiologia*, 817(1), 133–  
581 154. doi: 10.1007/s10750-017-3471-1
- 582 Cilleros, K., Valentini, A., Allard, L., Dejean, T., Etienne, R., Grenouillet, G., ... Brosse, S.  
583 (2019). Unlocking biodiversity and conservation studies in high diversity environments using  
584 environmental DNA (eDNA): a test with Guianese freshwater fishes. *Molecular Ecology*  
585 *Resources*, 7, 1–20. doi: 10.1111/1755-0998.12900
- 586 Chellappa, S., Câmara, M. R., Chellappa, N. T., Beveridge, M. C. M., & Huntingford, F. A..  
587 (2003). Reproductive ecology of a neotropical cichlid fish, *Cichla monoculus* (Osteichthyes:  
588 Cichlidae). *Brazilian Journal of Biology*, 63(1), 17-26. doi: 10.1590/S1519-  
589 69842003000100004
- 590 Chellappa, S., Bueno, R. M. X., Chellappa, T., Chellappa, N. T., Almeida e Val, V. M. F. (2009).  
591 Reproductive seasonality of the fish fauna and limnoecology of semi-arid Brazilian reservoirs.  
592 *Limnologia*, 39, 4, 325-329.

- 593 CPTEC (Centro de Previsão de Tempo e Estudos Climáticos), INPE (Instituto Nacional de  
594 Pesquisas Espaciais). (2018). Available at: <http://clima1.cptec.inpe.br/monitoramentobrasil/pt>
- 595 Deiner, K., & Altermatt, F. (2014). Transport distance of invertebrate environmental DNA in a  
596 natural river. *PLoS ONE*, 9(2). doi: 10.1371/journal.pone.0088786
- 597 Deiner, K., Fronhofer, E. A., Mächler, E., Walser, J. C., & Altermatt, F. (2016). Environmental  
598 DNA reveals that rivers are conveyor belts of biodiversity information. *Nature*  
599 *Communications*, 7, 1-8. doi:10.1038/ncomms12544.
- 600 Deiner, K., Bik, H. M., Mächler, E., Seymour, M., Lacoursière-Roussel, A., Altermatt, F., ...  
601 Bernatchez, L. (2017). Environmental DNA metabarcoding: Transforming how we survey  
602 animal and plant communities. *Molecular Ecology*, 26(21), 5872–5895.  
603 doi:10.1111/mec.14350
- 604 Doi, H., Inui, R., Akamatsu, Y., Kanno, K., Yamanaka, H., Takahara, T. & Minamoto, T. (2017).  
605 Environmental DNA analysis for estimating the abundance and biomass of stream fish.  
606 *Freshwater Biology*, 62(1), 30-39. doi:10.1111/fwb.12846
- 607 Dudgeon, D., Arthington, A. H., Gessner, M. O., Kawabata, Z. I., Knowler, D. J., Leveque, C.,  
608 ... Sullivan, C. A. (2006). Freshwater biodiversity: Importance, threats, status and conservation  
609 challenges. *Biological Reviews*, 81, 163–182. doi:10.1017/S1464793105006950
- 610 Dutra, G., Penido, I., Mello, G., & Pessali, T. C. (2016). Two new species of *Cyphocharax*  
611 (Teleostei: Characiformes: Curimatidae) from headwaters of the Jequitinhonha and São  
612 Francisco river basins, Minas Gerais, Brazil. *Zootaxa*, 4103(2), 154-158. doi:  
613 10.11646/zootaxa.4103.2.5
- 614 Eiler, A., Drakare, S., Bertilsson, S., Pernthaler, J., Peura, S., Rofner, C., ... Lindström, E. S.  
615 (2013). Unveiling distribution patterns of freshwater phytoplankton by a next generation  
616 sequencing based approach. *PLoS ONE*, 8. doi: 10.1371/journal.pone.0053516
- 617 Evans, N. T., Li, Y., Renshaw, M. A., Olds, B. P., Deiner, K., Turner, C. R., ... Pfrender, M. E.  
618 (2017). Fish community assessment with eDNA metabarcoding: effects of sampling design and  
619 bioinformatic filtering. *Canadian Journal of Fisheries and Aquatic Sciences*, 1374(January),  
620 1–13. doi: 10.1139/cjfas-2016-0306
- 621 FAO. (2012). Cold water fisheries in the trans-Himalayan countries. Available in:  
622 <ftp://ftp.fao.org/docrep/fao/005/y3994e/y3994e00.pdf>
- 623 Fitzgerald, D. B., Winemiller, K. O., Sabaj Pérez, M. H., & Sousa, L. M. (2017). Seasonal  
624 changes in the assembly mechanisms structuring tropical fish communities. *Ecology*, 98(1),  
625 21–31. doi: 10.1002/ecy.1616
- 626 Foster, Z., Sharpton, T., & Grünwald, N. (2017). Metacoder: An R package for visualization  
627 and manipulation of community taxonomic diversity data. *PLoS Computational Biology*, 13(2),  
628 1-15. doi: 10.1371/journal.pcbi.1005404
- 629 Godinho, H. P., Godinho, A. L., & Vono, V. (1999). Peixes da bacia do rio Jequitinhonha. In:  
630 Lowe Mcconnel (ed) Estudos ecológicos de comunidades de peixes tropicais. EDUSP, São  
631 Paulo, 414-423.

- 632 Gomes, L. C., Pessali, T. C., Sales, N. G., Pompeu, P. S., & Carvalho, D. C. (2015). Integrative  
633 taxonomy detects cryptic and overlooked fish species in a neotropical river basin. *Genetica*,  
634 143( 581). doi: 10.1007/s10709-015-9856-z
- 635 Graf, G. & Rosenberg, R. (1997). Bioresuspension and biodeposition: a review. *Journal of*  
636 *Marine Systems*, 3-4, 269-278.
- 637 Grey, E. K., Bernatchez, L., Cassey, P., Deiner, K., Deveney, M., Howland, K. L., ... Lodge,  
638 D. M. (2018). Effects of sampling effort on biodiversity patterns estimated from environmental  
639 DNA metabarcoding surveys. *Scientific Reports*, 8(1), 2–11. doi: 10.1038/s41598-018-27048-  
640 2
- 641 Grill, G., Lehner, B., Thieme, M., Geenen, B., Tickner, D., Antonelli, F., ... Zarfl, C. (2019).  
642 Mapping the world's free-flowing rivers. *Nature*, 569(7755), 215–221. doi: 10.1038/s41586-  
643 019-1111-9
- 644 Handley, L. L., Read, D. S., Winfield, I. J., Kimbell, H., Li, J., Hahn, C., ... Hänfling, B. (2019).  
645 Temporal and spatial variation in distribution of fish environmental DNA in England's largest  
646 lake. *Environmental DNA*, 1, 26-39.
- 647 Holman, L. E., de Bruyn, M., Creer, S., Carvalho, G., Robidart, J., & Rius, M. (2018). The  
648 detection of introduced and resident marine species using environmental DNA metabarcoding  
649 of seawater and sediment. *Scientific Reports*, 9, 11559.
- 650 Hulsen, T., de Vlieg, J., & Alkema, W. (2008). BioVenn—A web application for the comparison  
651 and visualization of biological lists using area- proportional Venn diagrams. *BMC Genomics*,  
652 9(1), 488. doi: 10.1186/1471-2164-9-488
- 653 IBGE (Fundação Instituto Brasileiro de Geografia e Estatística). (1997). Diagnóstico ambiental  
654 da Bacia do Rio Jequitinhonha. Ronaldo do Nascimento Gonçalves, Ministério do  
655 Planejamento e Orçamento, Salvador. Available at:  
656 <https://biblioteca.ibge.gov.br/visualizacao/livros/liv95902.pdf>
- 657 Intertechne. (2010). Inventário hidrelétrico dos rios Jequitinhonha e Araçuaí – Relatório final  
658 dos estudos de inventário. Apêndice D, estudos ambientais, 259 p.
- 659 IPBES (2019): Global assessment report on biodiversity and ecosystem services of the  
660 Intergovernmental Science-Policy Platform on Biodiversity and Ecosystem Services. E. S.  
661 Brondizio, J. Settele, S. Díaz, and H. T. Ngo (editors). IPBES secretariat, Bonn, Germany.
- 662 Jamieson, R. C., Joy, D. M., Lee, H., Kostaschuk, R., & Gordon, R. J. (2005). Resuspension of  
663 sediment-associated *Escherichia coli* in a natural stream. *Journal of Environmental Quality*.  
664 34, 581–589.
- 665 Jerde, C.L. (2019). Can we manage fisheries with the inherent uncertainty from eDNA?.  
666 *Journal Fish Biology*. doi:10.1111/jfb.14218
- 667 Jerep, F. C., Camelier, P., & Malabarba, L. R. (2016). *Serrapinnus zanatae*, a new species from  
668 the rio Jequitinhonha basin, Minas Gerais State, Brazil (Teleostei: Characidae:  
669 Cheirodontinae). *Ichthyological Exploration of Freshwaters*, 26(4), 289-298.
- 670 Jucker, T., Wintle, B., Shackelford, G., Bocquillon, P., Geffert, J. L., Kasoar, T., ... Mukherjee,  
671 N. (2018). Ten-year assessment of the 100 priority questions for global biodiversity  
672 conservation. *Conservation Biology*, 32, 1457-1463. doi: 10.1111/cobi.13159

- 673 Kelly, R. P., Port, J. A., Yamahara, K. M., & Crowder, L. B. (2014). Using environmental DNA  
674 to census marine fishes in a large mesocosm. *PLoS ONE*, 9(1), e86175. doi:  
675 10.1371/journal.pone.0086175
- 676 Kullander, S. O., & Lucena, C. A. S. (2006). A review of the species of *Crenicichla* (Teleostei:  
677 Cichlidae) from the Atlantic coastal rivers of southeastern Brazil from Bahia to Rio Grande do  
678 Sul States, with descriptions of three new species. *Neotropical Ichthyology*, 4(2), 127-146. doi:  
679 10.1590/S1679-62252006000200001
- 680 Leite, M. G. P., & Fujaco, M. A. G. (2010). A long-term annual water balance analysis of the  
681 Araçuaí River Basin, Brazil. *Journal of Geographical Sciences*, 20(6), 938–946. doi:  
682 10.1007/s11442-010-0822-5
- 683 Li, Y., Evans, N. T., Renshaw, M. A., Jerde, C. L., Olds, B. P., Shogren, A. J., ... Pfrender, M.  
684 E. (2018). Estimating fish alpha and beta-diversity along a small stream with environmental  
685 DNA metabarcoding. *Metabarcoding and Metagenomics*, 2, e24262. doi:  
686 10.3897/mbmg.2.24262
- 687 Lindenmayer, D.B., & Likens, G.E. (2009). Adaptive monitoring: a new paradigm for long-  
688 term research and monitoring. *Trends in Ecology and Evolution*, 24, 482–486. doi:  
689 10.1016/j.tree.2009.03.005
- 690 Mahé, F., Rognes, T., Quince, C., de Vargas, C., & Dunthorn, M. (2014). Swarm: robust and  
691 fast clustering method for amplicon-based studies. *PeerJ*, 2, e593. doi: 10.7717/peerj.593
- 692 McDevitt, A. D., Sales, N. G., Browett, S., Sparnenn, A., Mariani, S., Wangenstein, O. S., ...  
693 Benvenuto, C. (2019). Environmental DNA metabarcoding as an effective and rapid tool for  
694 fish monitoring in canals. *Journal Fish Biology*, 95, 179-182.
- 695 McIntyre, P. B., Liermann, C. A. R., & Revenga, C. (2016). Linking freshwater fishery  
696 management to global food security and biodiversity conservation. *Proceedings of the National  
697 Academy of Sciences*, 113(45), 12880-12885.
- 698 Melo, B. F., Dorini, B. F., Foresti, F., & Oliveira, C. (2018). Little divergence among  
699 mitochondrial lineages of *Prochilodus* (Teleostei, Characiformes). *Frontiers in Genetics*, 9, 1-  
700 11. doi: 10.3389/fgene.2018.00107
- 701 Miya, M., Sato, Y., Fukunaga, T., Sado, T., Poulsen, J. Y., Sato, K., Iwasaki, W. (2015). MiFish,  
702 a set of universal PCR primers for metabarcoding environmental DNA from fishes. *Royal  
703 Society Open Science*, 2, 150088. doi: 10.1098/rsos.150088
- 704 Nelson, J. S. (2006). *Fishes of the World*, 4th edn. John Wiley and Sons, Hoboken, New Jersey,  
705 601 p.
- 706 Nielsen, D. T. B., Pessali, T. C., & Dutra, G. (2017). A new annual fish of the genus  
707 *Simpsonichthys* (Cyprinodontiformes: Cynolebiidae) from the upper Rio Jequitinhonha basin,  
708 Brazil. *Zootaxa*, 4263(1), 165-172. doi: 10.11646/zootaxa.4263.1.8
- 709 Oksanen, J., Blanchet, F. G., Kindt, R., Legendre, P., Minchin, P. R., Ohara, R., ... Wagner, R.  
710 (2013). Package “vegan.” Community ecology package.  
711
- 712 Pawlowski, J., Kelly-Quinn, M., Altermatt, F., Apothéloz-Perret-Gentil, L., Beja, P., Boggero,  
713 A., ... Kahlert, M. (2018). The future of biotic indices in the ecogenomic era: Integrating

- 714 (e)DNA metabarcoding in biological assessment of aquatic ecosystems. *Science of the Total*  
715 *Environment*, 637, 1295–1310. doi: 10.1016/j.scitotenv.2018.05.002
- 716 Pelicice, F. M. & Agostinho A. A. (2007). Fish-passage facilities as ecological traps in large  
717 neotropical rivers. *Conservation Biology*, 22, 180-188. doi: 10.1111/j.1523-1739.2007.00849.x
- 718 Pompeu, P. S., Agostinho, A. A., & Pelicice, F. M. (2012). Existing and future challenges: the  
719 concept of successful fish passage in South America. *River Research and Applications*, 28,  
720 504-512. doi: 10.1002/rra.1557
- 721 Pont, D., Rocle, M., Valentini, A., Civade, R., Jean, P., Maire, A., ... Dejean, T. (2018).  
722 Environmental DNA reveals quantitative patterns of fish biodiversity in large rivers despite its  
723 downstream transportation. *Scientific Reports*, 8(1), 10361. [https://doi.org/10.1038/s41598-](https://doi.org/10.1038/s41598-018-28424-8)  
724 018-28424-8
- 725 Radinger, J., Britton, J. R., Carlson, S. M., Magurran, A. E., Alcaraz-Hernández, J. D.,  
726 Almodóvar, A., ... García-Berthou, E. (2018). Effective monitoring of freshwater fish. *Zenodo*.  
727 doi: 10.5281/zenodo.1480407
- 728 Rahel, F. J. (2000). Homogenization of fish faunas across the United States. *Science*,  
729 288:854–856
- 730 Reis, R. E., Albert, J. S., Di Dario, F., Mincarone, M. M., Petry, P., ... Rocha, L. A. (2016). Fish  
731 biodiversity and conservation in South America. *Journal of Fish Biology*, 89(1), 12-47. doi:  
732 10.1111/jfb.13016
- 733 Revenga, C., Campbell, I., Abell, R., de Villiers, P., & Bryer, M. (2005). Prospects for  
734 monitoring freshwater ecosystems towards the 2010 targets. *Philosophical Transactions of the*  
735 *Royal Society B: Biological Sciences*, 360, 397–413. doi: 10.1098/rstb.2004.1595
- 736 Ribeiro, V. R., Gubiani, E., A., & Cunicu, A. M. (2017). Occurrence of non-native fish species  
737 in neotropical river under the influence of aquaculture activities. *Boletim do Instituto de Pesca*,  
738 44(1), 80-90. doi:10.20950/1678-2305.2018.288
- 739 Rosa, R. S., & Lima, F. C. T. (2008). Livro Vermelho da Fauna Brasileira Ameaçada de extinção  
740 In: Machado ABM, Drummond GM, Paglia AP (eds). Os peixes brasileiros ameaçados de  
741 extinção Ministério do Meio Ambiente, Brasília.
- 742 Sales, N. G., Pessali, T. C., Andrade-Neto, F., & Carvalho, D. C. (2018). Introgression from  
743 non-native species unveils a hidden threat to the neotropical fish *Prochilodus hartii*. *Biological*  
744 *Invasions*, 20(3), 555-566. doi: 10.1007/s10530-017-1556-4
- 745 Sales, N. G., Wangensteen, O. S., Carvalho, D. C., & Mariani, S. (2019). Influence of  
746 preservation method, sampling medium and time on eDNA recovery in a Neotropical river.  
747 *Environmental DNA*, 1, 119-130.
- 748 Sales, N. G., Kaizer, M. C., Coscia, I., Perkins, J. C, Highlands, A., Boubli, J. P., ... McDevitt,  
749 A. D. (2020). Assessing the potential of environmental DNA metabarcoding for monitoring  
750 Neotropical mammals: a case study in the Amazon and Atlantic Forest, Brazil. *Mammal*  
751 *Review*, doi: 10.1111/mam.12183.
- 752 Schmelzle, M. C., & Kinziger, A. P. (2016). Using occupancy modelling to compare  
753 environmental DNA to traditional field methods for regional-scale monitoring of an

- 754 endangered aquatic species. *Molecular Ecology Resources*, 16(4), 895–908. doi: 10.1111/1755-  
755 0998.12501
- 756 Schwartz, M. K., Luikart, G. & Waples, R.S. (2006). Genetic monitoring as a promising tool  
757 for conservation and management. *Trends in Ecology and Evolution*, 22 (1), 25-33. doi:  
758 10.1016/j.tree.2006.08.009
- 759 Shelton, A. O., Kelly, R. P., O'Donnell, J. L., Park, L., Schwenke, P., Greene, C., ... Beamer,  
760 E. M. (2019). Environmental DNA provides quantitative estimates of a threatened salmon  
761 species. *Biological Conservation*, 237, 383–391. doi: 10.1016/j.biocon.2019.07.003
- 762 Socolar, J. B., Gilroy, J. J., Kunin, W. E., & Edwards, D. P. (2015). How should beta-diversity  
763 inform biodiversity conservation? *Trends in Ecology and Evolution*, 1, 1–14. doi:  
764 10.1016/j.tree.2015.11.005
- 765 Thomé, M. T. C., & Haddad, C. F. B. (2019). Brazil's biodiversity researchers need help.  
766 *Science*, 364(6446), 1144-1145.
- 767 Trimble, M. J., & R. J. van Aarde. (2012). Geographical and taxonomic biases in research on  
768 biodiversity in human-modified landscapes. *Ecosphere*, 3(12), 119-129. doi: 10.1890/ES12-  
769 00299.1
- 770 Turner, C. R., Uy, K. L., & Everhart, R. C. (2015). Fish environmental DNA is more  
771 concentrated in aquatic sediments than surface water. *Biological Conservation*, 183, 93–102.  
772 doi: 10.1016/j.biocon.2014.11.017
- 773 Ushio, M., Murakami, H., Masuda, R., Sado, T., Miya, M., Sakurai, S., Yamanaka, H.,  
774 Minamoto, T., Kondoh, M. (2018). Quantitative monitoring of multispecies fish environmental  
775 DNA using high-throughput sequencing. *Metabarcoding and Metagenomics*. 2, e23297.  
776 doi:10.3897/mbmg.2.23297
- 777 Vitule, J. R. S., Bornatowski, H., Freire, C. A., & Abilhoa, V. (2014). Extralimital introductions  
778 of *Salminus brasiliensis* (Cuvier, 1816) (Teleostei, Characidae) for sport fishing purposes: a  
779 growing challenge for the conservation of biodiversity in neotropical aquatic ecosystems.  
780 *BioInvasions Records*, 3(4), 291–296. doi: 10.3391/bir.2014.3.4.11
- 781 Vorosmarty, C. J., McIntyre, P. B., Gessner, M. O., Dudgeon, D., Prusevich, A., Glidden, S.  
782 (2010). Global threats to human water security and river biodiversity. *Nature*, 467, 555-561.  
783 doi: 10.0.4.14/nature09440
- 784 WWF. 2018. Living Planet Report – 2018: Aiming Higher. Grooten, M. and Almond, R. E. A.  
785 (Eds.) WWF, Gland, Switzerland.
- 786 Yamanaka, H., Minamoto, T., Matsuura, J., Sakurai, S., Tsuji, S., Motozawa, H., ... Kondo, A.  
787 (2017). A simple method for preserving environmental DNA in water samples at ambient  
788 temperature by addition of cationic surfactant. *Limnology*, 18(2), 233–324. doi: 10.1007/  
789 s10201-016-0508-5
- 790 Yu, D. W., Ji, Y., Emerson, B. C., Wang, X., Ye, C., Yang, C. & Ding, Z. (2012). Biodiversity  
791 soup: metabarcoding of arthropods for rapid biodiversity assessment and biomonitoring.  
792 *Methods in Ecology and Evolution*, 3, 613-623. doi: 10.1111/j.2041-210X.2012.00198.x
- 793

794

795 **DATA ACCESSIBILITY**

796 Raw data will be made available on DRYAD upon acceptance.

797

798 **AUTHOR CONTRIBUTIONS**

799 NGS, OSW and SM designed the study. NGS carried out the fieldwork. NGS and OSW  
800 performed the laboratory work and the bioinformatics. NGS analysed the data primarily, with  
801 contributions from ADM, IC, KD and KP. All authors discussed the results and implications.  
802 NGS drafted the manuscript, all authors provided manuscript input and contributed in  
803 discussion that developed the study.

804

805

806

807

808

809

810

811

812

813

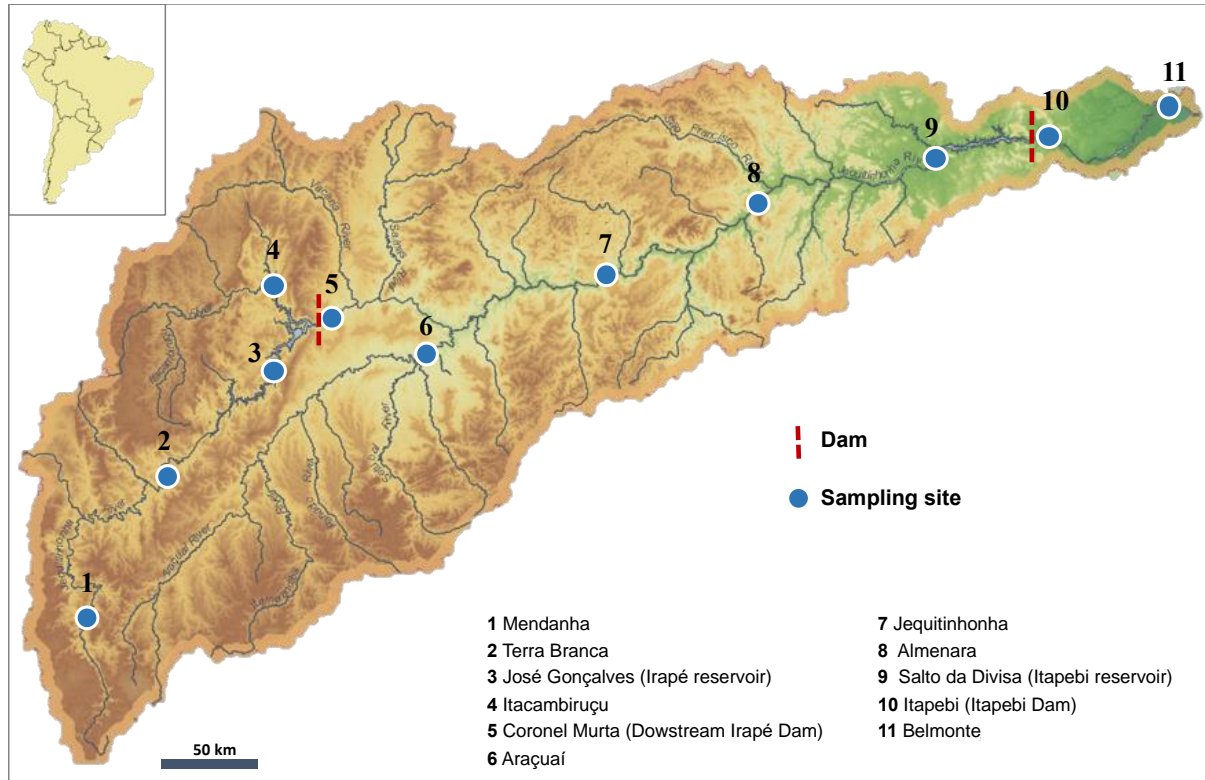

814  
815

816 FIGURE 1 | The Jequitinhonha river basin, including sampling sites used in the study, dams  
817 and respective hydrological regions.

818

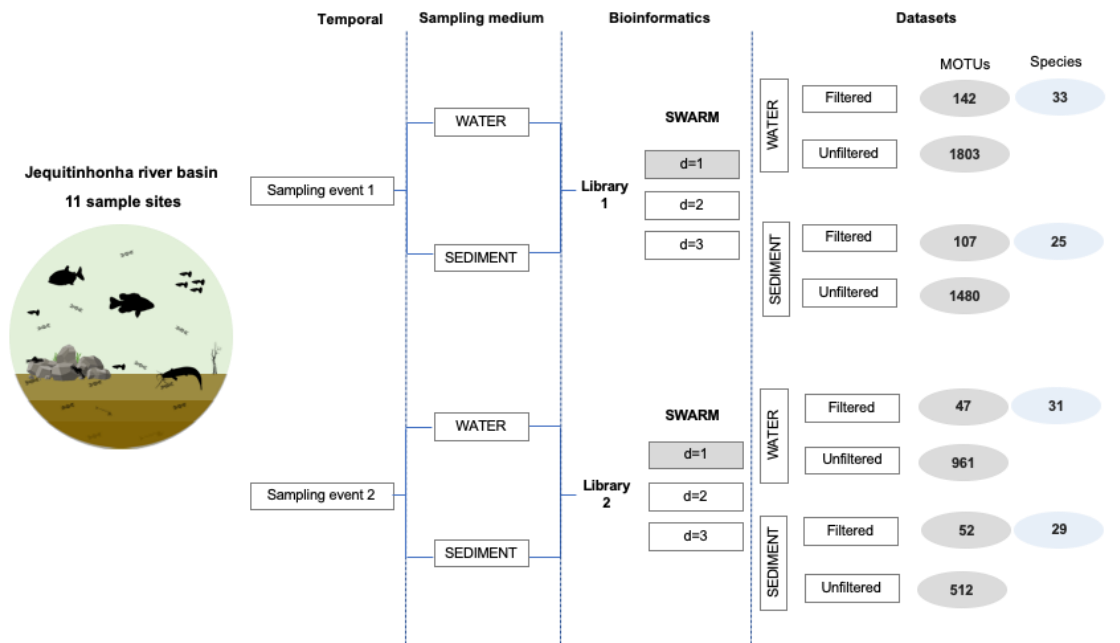

819

820 FIGURE 2 | Workflow illustrating the methods used in this paper and respective number of  
821 MOTUs retrieved in each dataset analysed, and the final number of species assigned with >0.97  
822 identity.



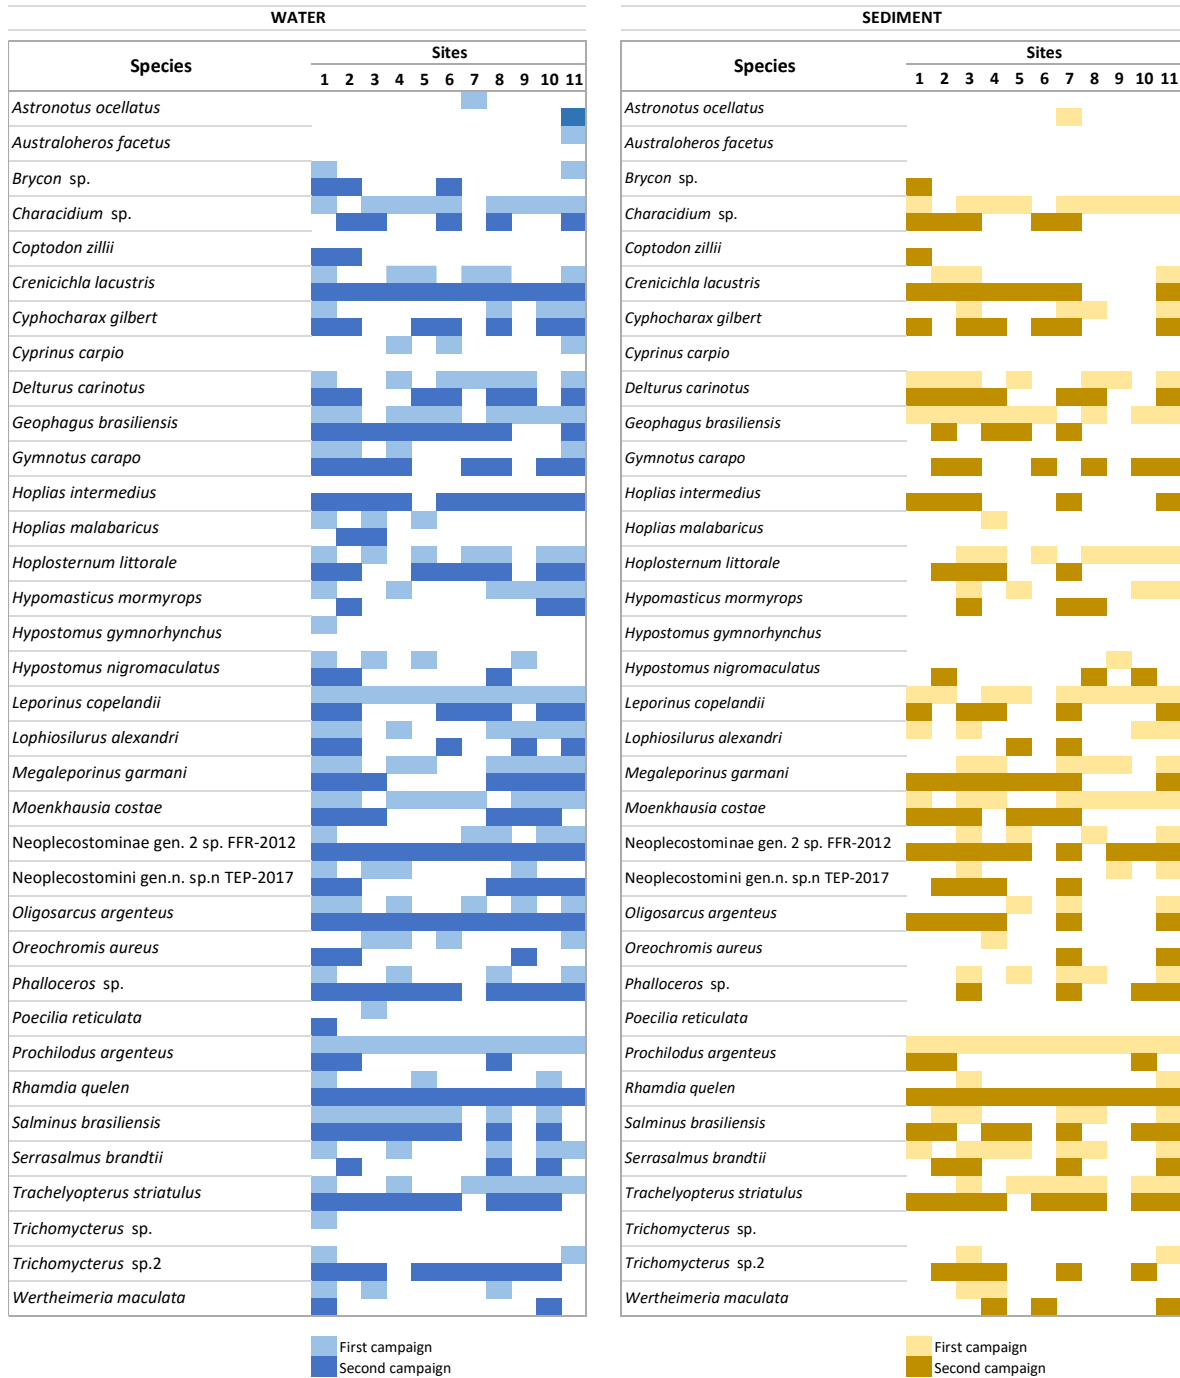

823

824 FIGURE 3 | Species distribution in the Jequitinhonha River Basin, according to sampling  
825 media and campaign.

826

827

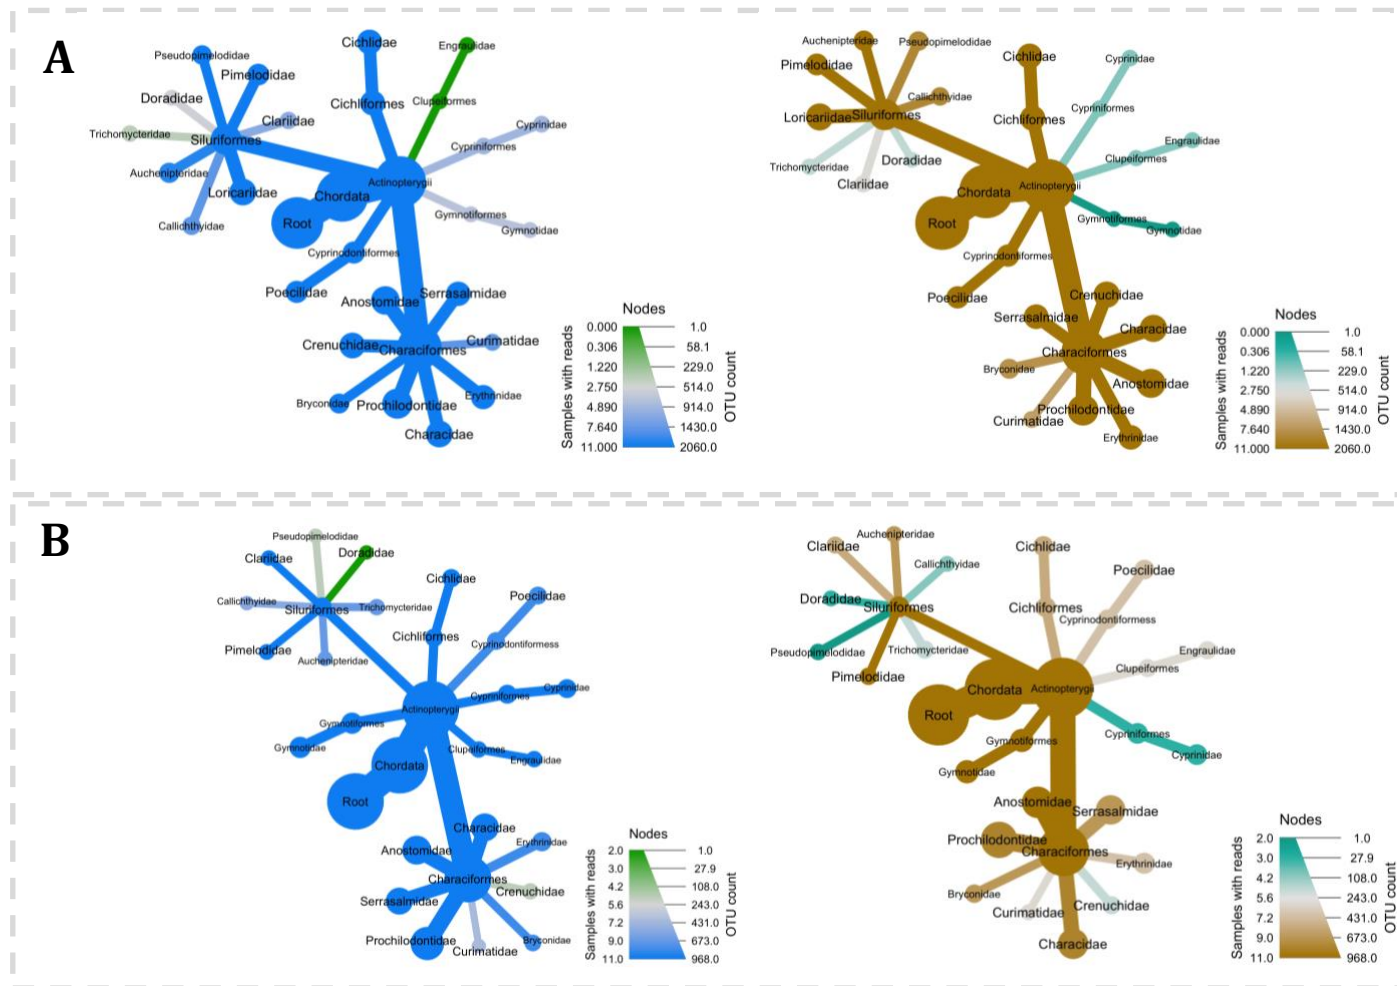

FIGURE 4 | Heat trees displaying the fish diversity recovered for Jequitinhonha River Basin using eDNA metabarcoding unfiltered datasets, during the first (A) and second (B) campaigns. Blue = Water samples; Brown = Sediment samples.

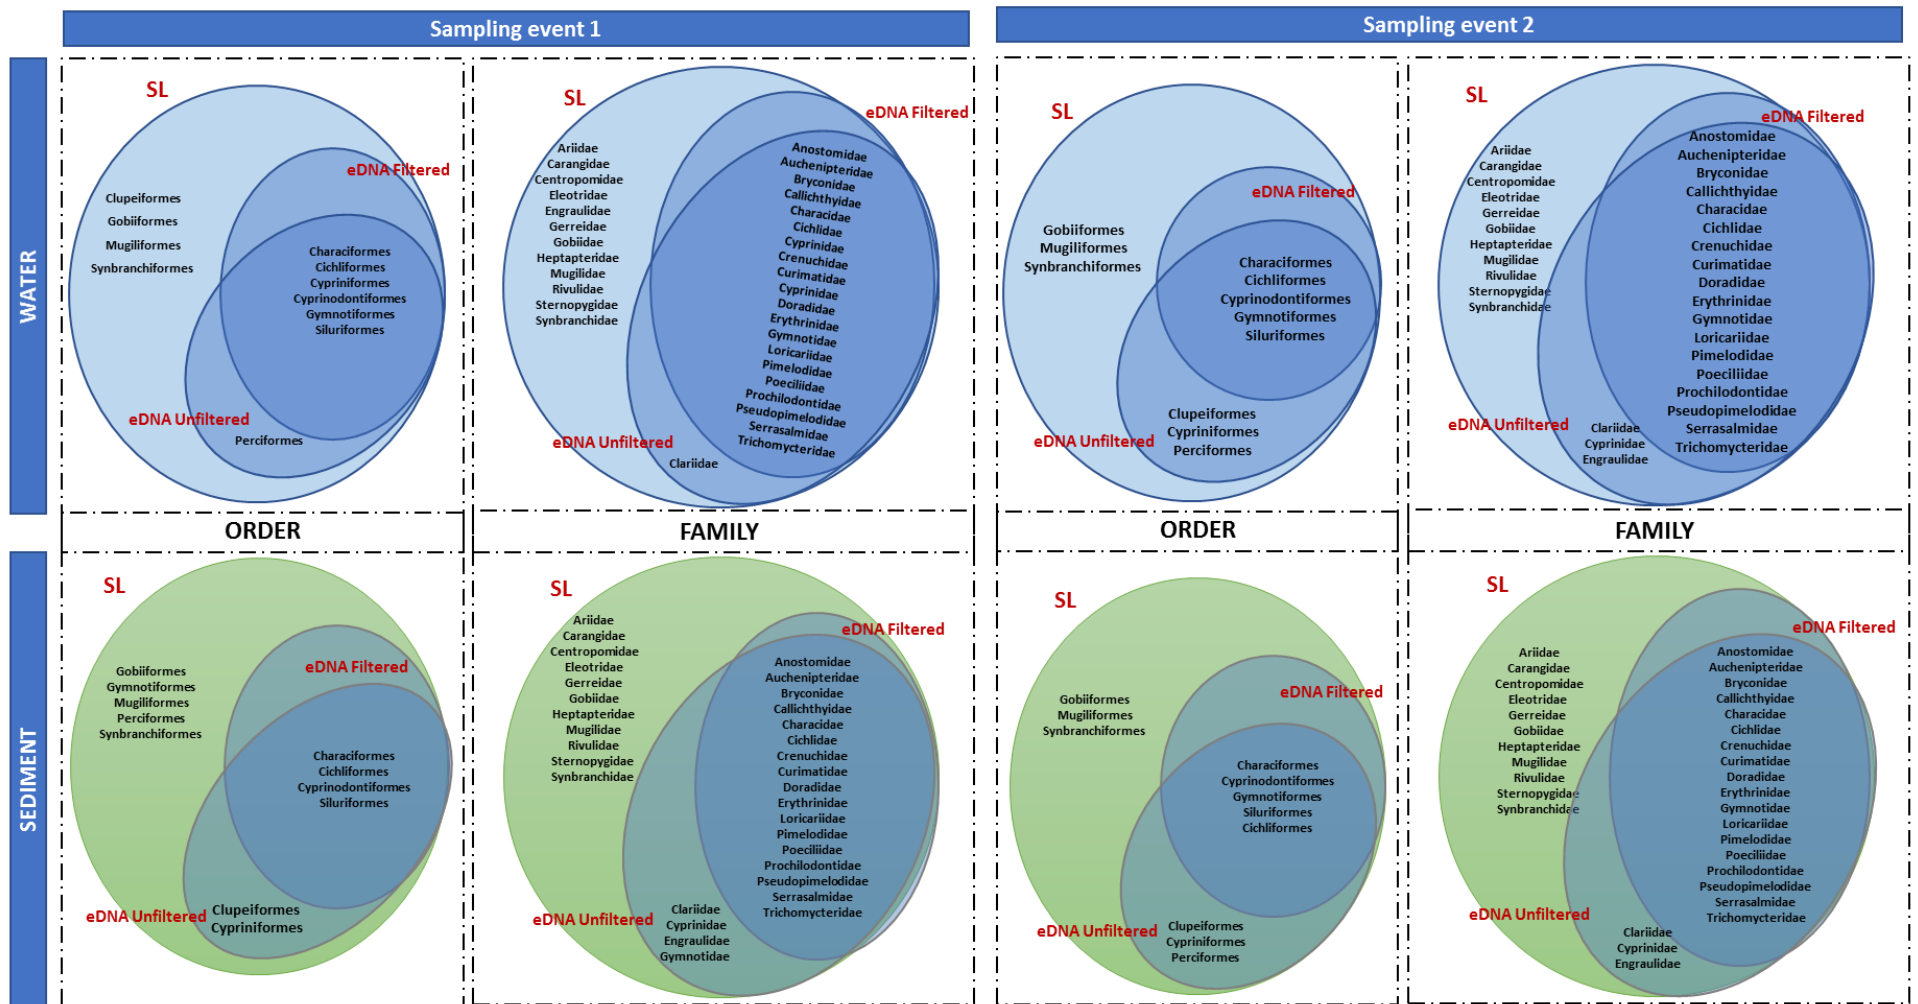

FIGURE 5 | Venn diagram of fish orders and families comparing the data included in the species list based on traditional sampling (SL) to eDNA detected in distinct sampling media (water vs sediment); sampling campaign; and datasets analysed (unfiltered vs filtered).

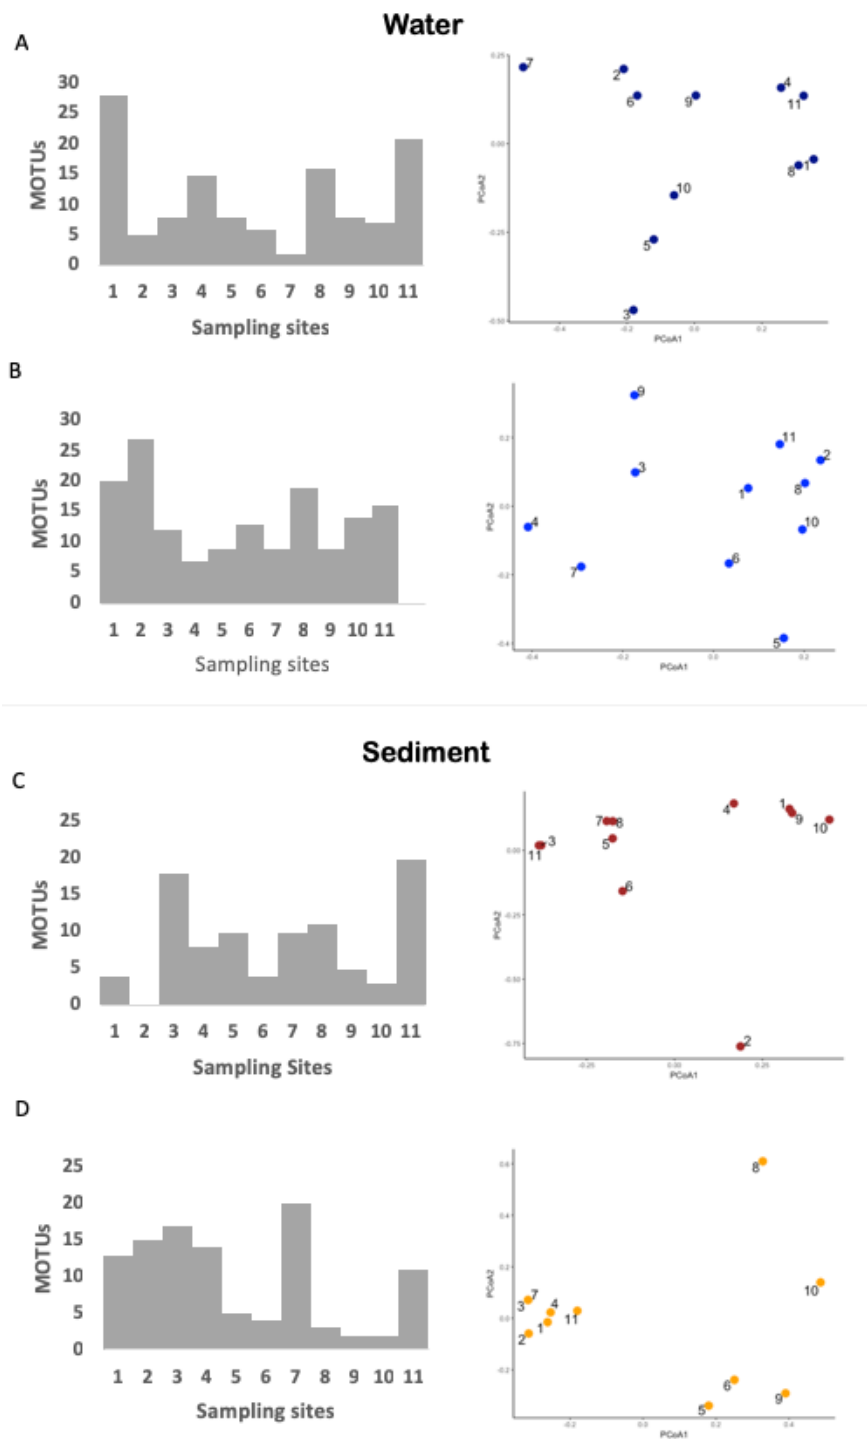

FIGURE 6 | Filtered dataset, showing the species richness distribution along the Jequitinhonha River Basin and Principal Coordinates Analysis (PCoA) of  $\beta$ -diversity of sampling locations (Jaccard distance). A) Water samples obtained in the first campaign; B) Water samples obtained in the second campaign; C) Sediment samples obtained in the first campaign; D) Sediment samples obtained in the second campaign.

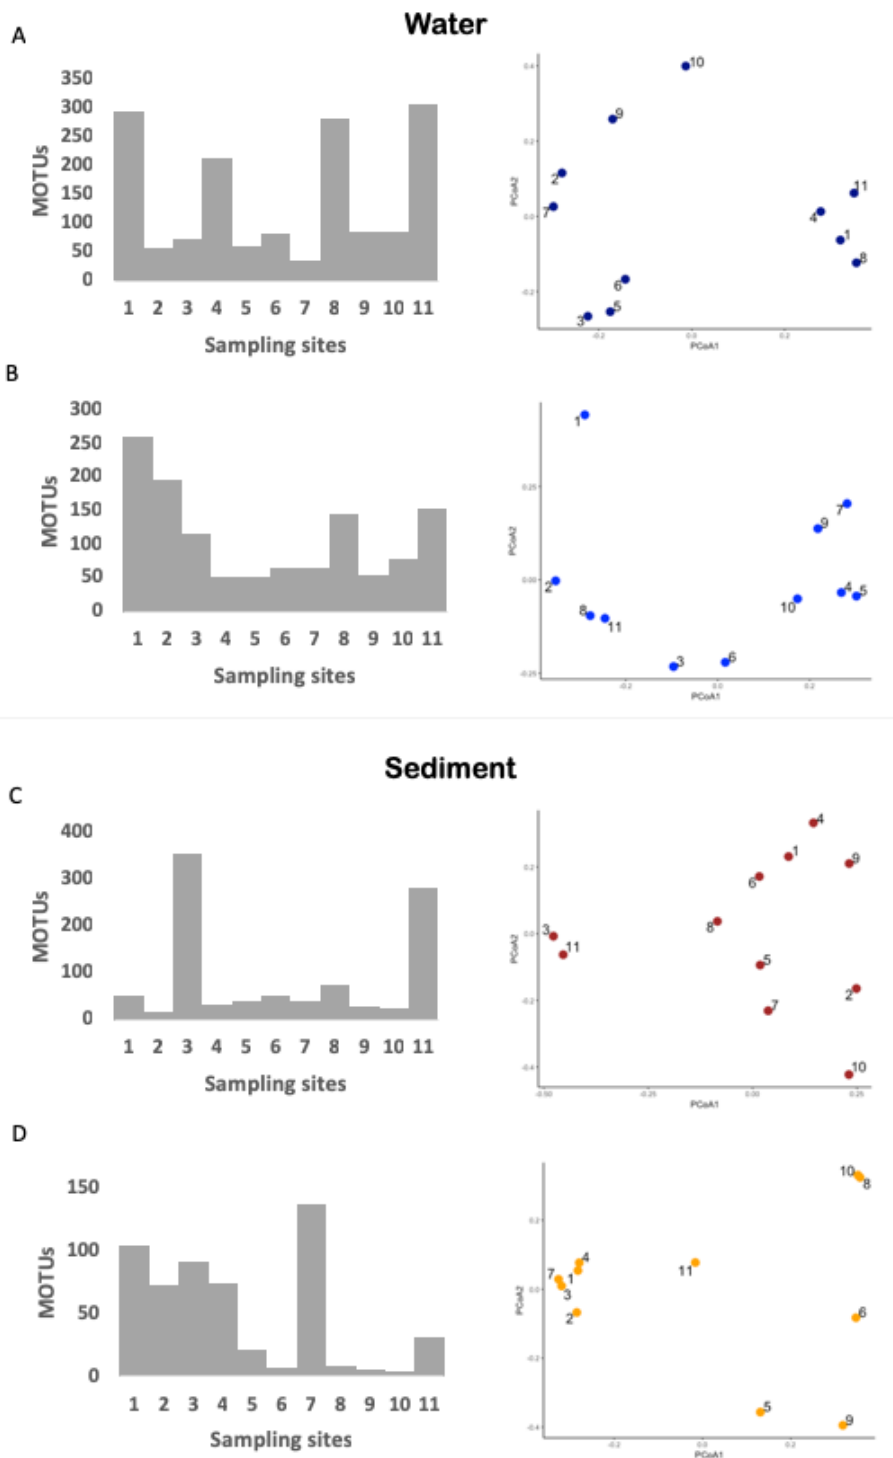

FIGURE 7 | Unfiltered dataset, showing the species richness distribution along the Jequitinhonha River Basin and Principal Coordinates Analysis (PCoA) of  $\beta$ -diversity of sampling locations (Jaccard distance). A) Water samples obtained in the first campaign; B) Water samples obtained in the second campaign; C) Sediment samples obtained in the first campaign; D) Sediment samples obtained in the second campaign.

**TABLE 1** | Mantel  $r$  and  $p$ -values (in parentheses) for all the pairwise comparisons between datasets, sampling media, geographic distance and presence of barriers (dams).

|   |   | First campaign        |                     |                     |                    | Second campaign     |                     |                     |                    |                    |
|---|---|-----------------------|---------------------|---------------------|--------------------|---------------------|---------------------|---------------------|--------------------|--------------------|
|   |   | Water                 |                     | Sediment            |                    | Water               |                     | Sediment            |                    |                    |
|   |   | Unfiltered            | Filtered            | Unfiltered          | Filtered           | Unfiltered          | Filtered            | Unfiltered          | Filtered           |                    |
| 1 | W | Unfiltered            | 1                   |                     |                    |                     |                     |                     |                    |                    |
|   |   | Filtered              | 0.689<br>(p=0.001)  | 1                   |                    |                     |                     |                     |                    |                    |
|   | S | Unfiltered            | 0.050<br>(p=0.359)  | -0.268<br>(p=0.939) | 1                  |                     |                     |                     |                    |                    |
|   |   | Filtered              | 0.219<br>(p=0.162)  | 0.134<br>(p=0.250)  | 0.534<br>(p=0.005) | 1                   |                     |                     |                    |                    |
| 2 | W | Unfiltered            | 0.193<br>(p=0.445)  | -0.142<br>(p=0.815) | 0.110(p=0.221)     | 0.029<br>(p=0.386)  | 1                   |                     |                    |                    |
|   |   | Filtered              | 0.011<br>(p=0.444)  | -0.017<br>(p=0.491) | 0.055(p=0.309)     | -0.034<br>(p=0.555) | 0.572<br>(p=0.001)  | 1                   |                    |                    |
|   | S | Unfiltered            | -0.100<br>(p=0.656) | -0.235<br>(p=0.914) | 0.017(p=0.389)     | -0.047<br>(p=0.548) | -0.025<br>(p=0.544) | -0.174<br>(p=0.870) | 1                  |                    |
|   |   | Filtered              | -0.121<br>(p=0.691) | -0.278<br>(p=0.929) | 0.109(p=0.269)     | -0.104<br>(p=0.645) | 0.075<br>(p=0.309)  | -0.040<br>(p=0.528) | 0.822<br>(p=0.001) | 1                  |
|   |   | Longitudinal distance | -0.213<br>(p=0.897) | -0.258<br>(p=0.947) | -0.041(p=0.99)     | -0.028<br>(p=0.561) | 0.137<br>(p=0.154)  | -0.043<br>(p=0.597) | 0.189<br>(p=0.114) | 0.290<br>(p=0.052) |
|   |   | Presence of dam       | -0.102<br>(p=0.690) | -0.172<br>(p=0.859) | 0.028<br>(p=0.416) | -0.004<br>(p=0.514) | -0.018<br>(p=0.488) | -0.181<br>(0.876)   | 0.178<br>(p=0.161) | 0.108<br>(p=0.26)  |
